# Supplementary material for: The Isolation and In Vitro Differentiation of Primary Fetal Baboon Tracheal Epithelial Cells for the Study of SARS-CoV-2 Host-Virus Interactions
Source: MDPI journal article supplement (doi:10.3390/v15040862), 2023-03-28
Supplement: s1 [file s1]

**A. ACE2 western blot images**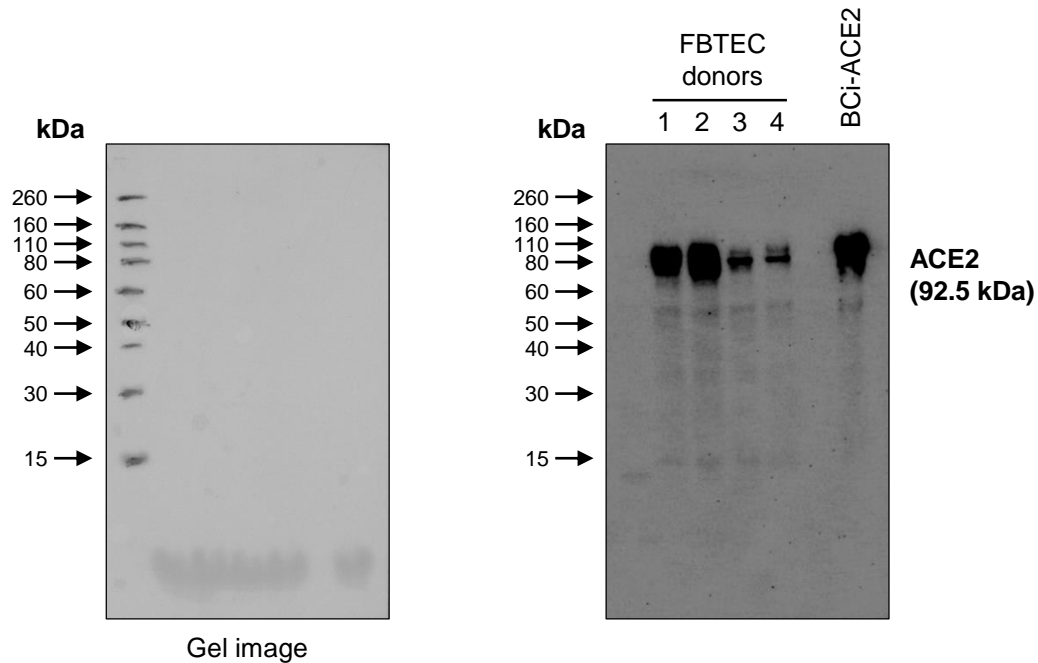**B. GAPDH western blot images**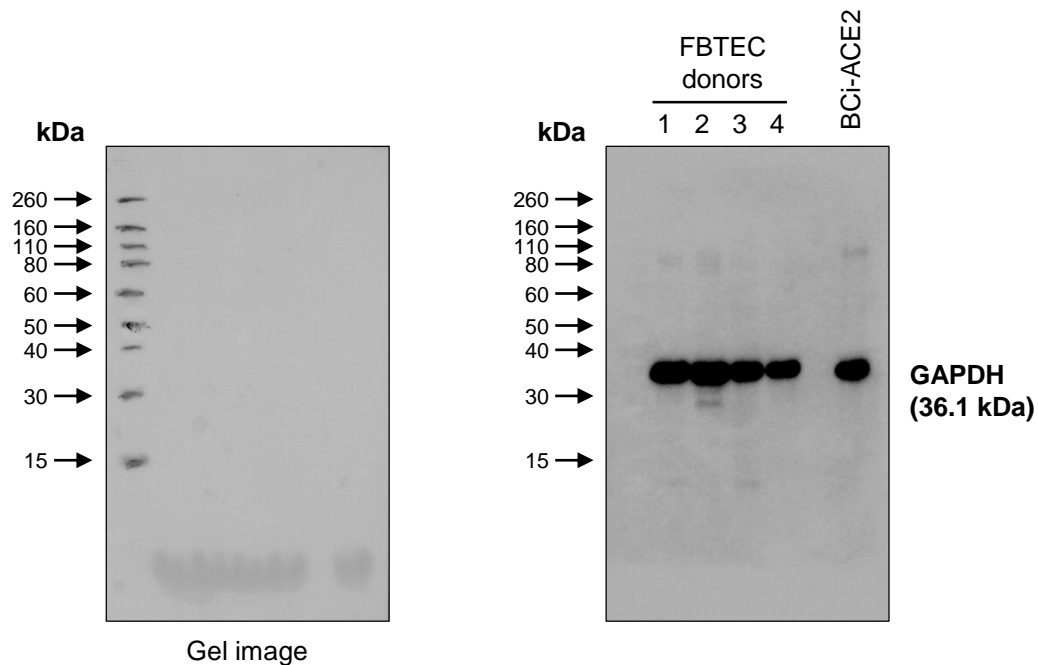

**Supplementary Figure S1.** Original western blot images of ACE2 and GAPDH protein levels in  $n = 4$  FBTEC donors (1-4) differentiated on ALI culture. At ALI day 28, the cells were harvested for analysis. Cell lysates of the human airway epithelial cell line BCI-NS1.1 over-expressing human ACE2 (BCi-ACE2) were used as a positive control. (A) ACE2 western blot images. (B) GAPDH western blot images.

**A. TMPRSS2 western blot images**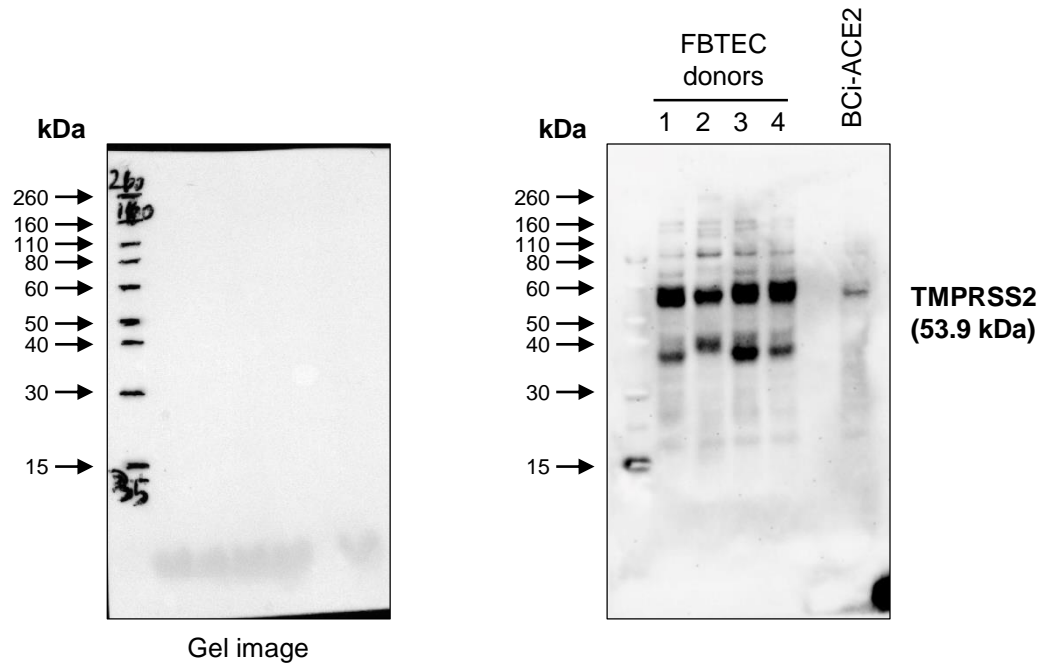**B. GAPDH western blot images**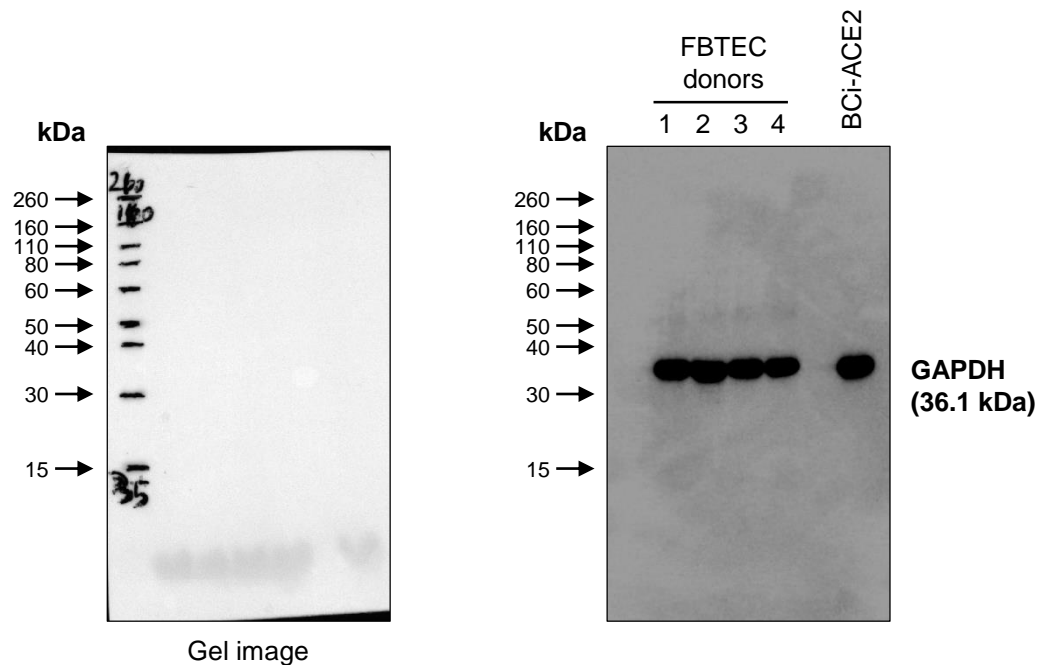

**Supplementary Figure S2.** Original western blot images of TMPRSS2 and GAPDH protein levels in  $n = 4$  FBTEC donors (1-4) differentiated on ALI culture. At ALI day 28, the cells were harvested for analysis. Cell lysates of the human airway epithelial cell line BCI-NS1.1 over-expressing human ACE2 (BCi-ACE2) were used as a positive control. (A) TMPRSS2 western blot images. (B) GAPDH western blot images.
